# Supplementary material
Source: MDPI journal article supplement (https://www.mdpi.com/2071-1050/12/14/5855)
Supplement: s1 [file s1]

## Supplementary Material

**Table S1:** Policies for climate and agriculture in Cabo Verde. AI = projects actively implemented; LF=projects legally formulated.

| Project                                                                                | Year      | Status | Target                    |
|----------------------------------------------------------------------------------------|-----------|--------|---------------------------|
| Strategic Plan of Agriculture development (PEDA)                                       | 2004      | AI     | Productivity              |
| National Agricultural Investment Program (PNIA/NAIP)                                   | 2010      | AI     | Productivity & Mitigation |
| The Program for the Promotion of Rural Socio-Economic Opportunities (POSER)            | 2014      | AI     | Productivity & Adaptation |
| Agriculture Development Action Plan on the islands of ST, FG, SA (PADA)                | 2009-2012 | AI     | Productivity              |
| Municipal Environmental Plan (PEM)                                                     | 2017      | AI     | Mitigation                |
| National Irrigation Plan (PNI)                                                         | 2000      | AI     | Mitigation                |
| National Horticultural Plan (PNH)                                                      | 2010      | AI     | Mitigation                |
| National Agricultural Investment Plan Nutritional Food Security (PNIASAN)              | 2017      | AI     | Mitigation                |
| Adaptation Resilience to Climate Change Plan (PRODOC)                                  | 2007      | AI     | Mitigation                |
| United Nations Framework Convention on Climate Change (UNFCCC)                         | 2000      | AI     | Mitigation                |
| National Adaptation Programme of Action on Climate Change (NAPA)                       | 2008      | AI     | Mitigation & Adaptation   |
| Growth and Poverty Reduction Strategy Paper (GPRSP)                                    | 2012/2016 | AI     | Adaptation & Productivity |
| Strategic Plan for Sustainable Development (PEDS)                                      | 2016      | AI     | Productivity              |
| Strategic Plan for Rural Extension and Agrobusiness (SPREA)                            | 2017      | AI     | Productivity              |
| National Plan for Research and Development (NPRD)                                      | 2017      | LF     | Adaptation                |
| Strategic Plan of the National Agriculture Research System (PE-SNIA)                   | 2017/2024 | LF     | Adaptation & Productivity |
| Comprehensive Africa Agriculture Development Programme (CAADP)                         | 2009      | LF     | Adaptation & Productivity |
| Sector Letter for Fishery Policy (CPP)                                                 | 2014      | LF     | Adaptation & Productivity |
| National Strategy on Food and Nutrition Security (ENSAN)                               | 2015      | LF     | Adaptation & Productivity |
| National Action Plan for Food and Nutrition Security (PANSAN)                          | 2014/2016 | LF     | Adaptation & Productivity |
| Strategy for Agro-silvopastoral and Environmental Development in Maio Island (SASEDMI) | 2018      | LF     | Adaptation & Productivity |
| Emergency Programme for Mitigation of Drought and Bad Agriculture Year (PEMSMAA)       | 2017/2018 | LF     | Adaptation & Productivity |

Sources: [43,45,60-62].
